# Supplementary material for: Elongation flow-triggered morphology transitions of dendritic polyethylene amphiphilic assemblies: host–guest implications
Source: Royal Society of Chemistry journal article supplement (doi:10.1039/c4sm01012d), 2014-06-23
Supplement: c4sm01012d1.pdf [file c4sm01012d1.pdf]

## Electronic Supplementary Information

### Elongation Flow-Triggered Morphology Transitions of Dendritic Polyethylene Amphiphilic Assemblies: Host–Guest Implications

Jieqing Zhu, Minghao Tan, Ling Zhang\* and Qihe Yin

DSAPM Lab, School of Chemistry and Chemical Engineering, and PCFM Lab, OFCM Institute, Sun Yat-Sen University, Guangzhou 510275, China .

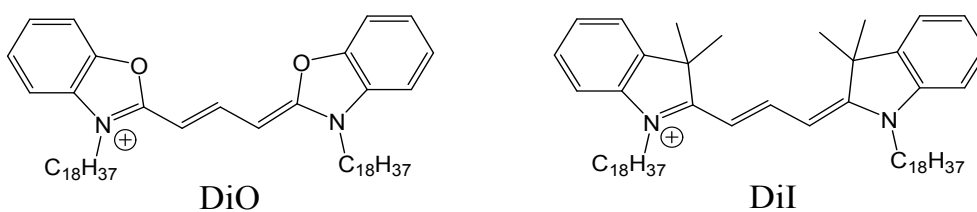

**Scheme S1.** Molecular Structures of DiO and DiI.

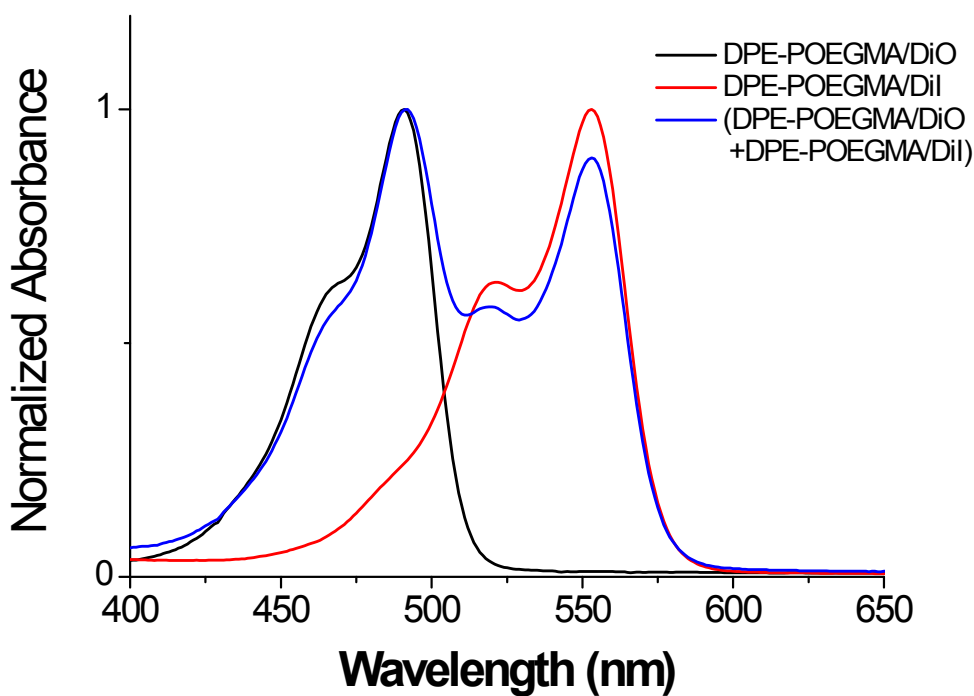

**Figure S1.** Absorption spectra of DiI/DiO in DPE-POEGMA aqueous solutions at room temperature.
